# Supplementary material
Source: PubMed Central journal article supplement (PMC2851915)
Supplement: 0912501107_pnas.200912501SI.pdf [file 0912501107_pnas.200912501SI.pdf]

# Supporting Information

Rubinoff and Schmitz 10.1073/pnas.0912501107

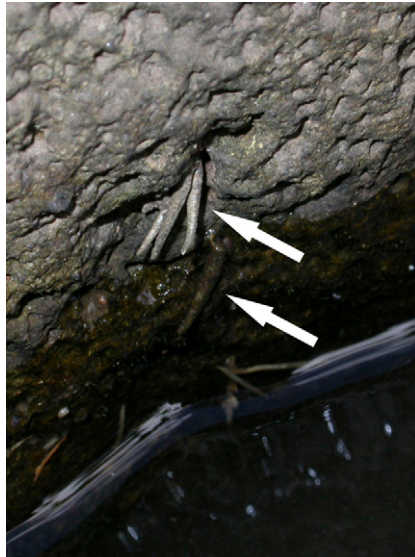

Fig. S1. *Hyposmocoma* cone case-bearing larvae (arrows) resting communally, hiding in small holes on dry rocks downstream above and under the water line.

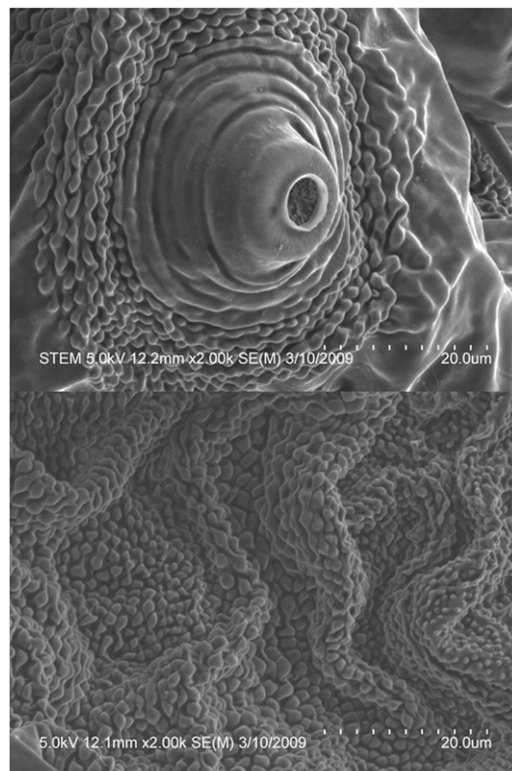

Fig. S2. Scanning electron microscope images taken from an amphibious *Hyposmocoma* larva, showing details of an unmodified spiracle and of the hydrophilic abdominal surface of the cuticle.

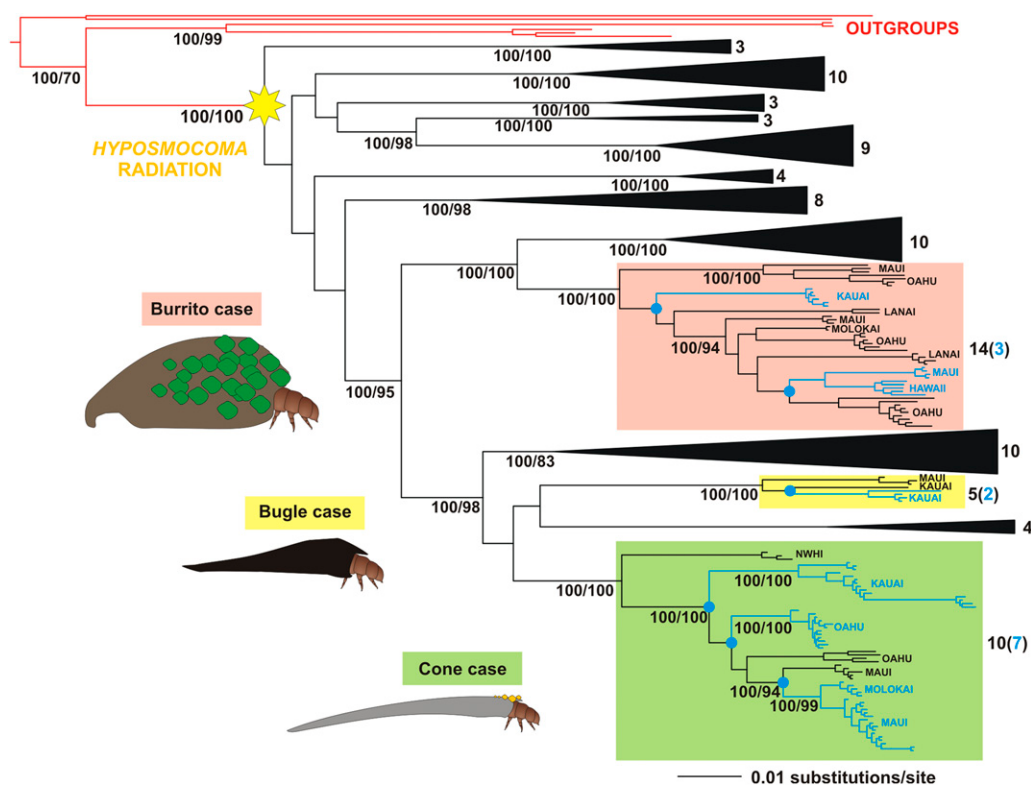

**Fig. S3.** Phylogeny of *Hyposmocoma* moths based on molecular data with the three lineages including amphibious species highlighted. Shown is the Bayesian tree based on combined analysis of three genes of interest. Bayesian posterior probabilities  $\geq 95$  and nonparametric bootstrap supports  $\geq 70$  are given under each corresponding node and clade. This topology is congruent with the maximum likelihood topology. Numbers on the right of the different terrestrial clades represent species per clade, with blue numbers in brackets representing total of aquatic species. Blue dots show multiple derivations of the aquatic life history.



Values are presented for the ingroup and the whole dataset. COI, cytochrome oxidase I; CAD, carbomoylphosphate synthase; EF1 $\alpha$ , elongation factor 1 $\alpha$ ; TIM, Transitional Model; TVM, Transversional Model; SYM, Symmetrical Model; GTR, General Time Reversible Model.

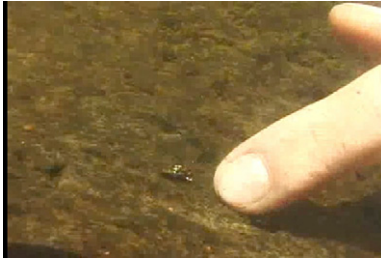

**Movie S1.** Aquatic burrito case-bearing *Hyposmocoma* larva in stream returning to the substrate with the aid of its silk drag line after being dislodged.

[Movie S1.](#)

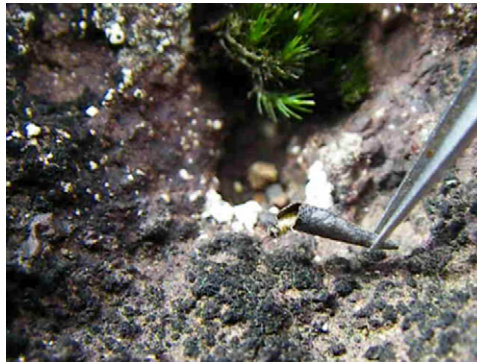

**Movie S2.** Aquatic bugle case-bearing *Hyposmocoma* larva crawling on dry rock, meters from stream.

[Movie S2.](#)
